# Supplementary material
Source: PubMed Central journal article supplement (PMC6913793)
Supplement: Supp_Fig2.pdf [file Supp_Fig2.pdf]

**A**  
Sub-network of identified mutations

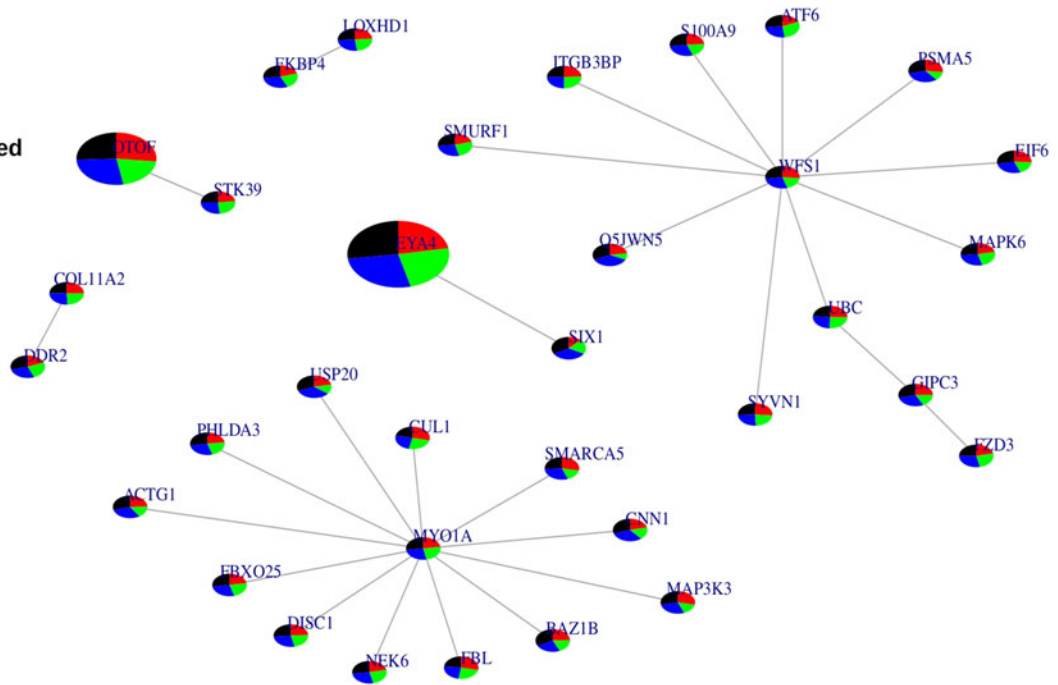

**B**  
Pathways Enrichment

Pathway enrichment using Enrichr (<http://www.amppharm.mssm.edu/Enrichr>), based on genes in the sub-network in A).

| Term                                        | P-value | Z-score | Genes                       |
|---------------------------------------------|---------|---------|-----------------------------|
| Protein processing in endoplasmic reticulum | 0.0005  | -1.81   | <i>WFS1;CUL1;SYVN1;ATF6</i> |
| Ubiquitin mediated proteolysis              | 0.003   | -1.62   | <i>SMURF1;CUL1;SYVN1</i>    |

**C**  
Molecular Function

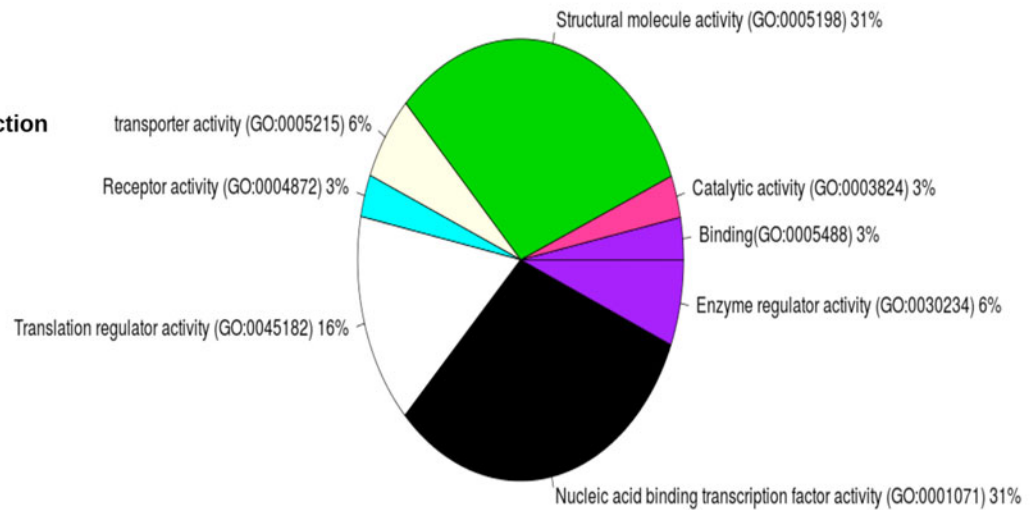

**SUPPLEMENTARY FIG. S2.** Subnetwork of interacting genes with mutations potentially associated with hearing loss based on the merged data from family members. (**panel A**) Subnetwork extracted from the protein–protein interaction database, (**panel B**) *Top* two associated biological pathways to the identified subnetwork, and (**panel C**) molecular functions of the related subnetwork.
