# Supplementary material
Source: PubMed Central journal article supplement (PMC6913793)
Supplement: Supp_Table1.pdf [file Supp_Table1.pdf]

SUPPLEMENTARY TABLE S1. OTHER VARIANTS IDENTIFIED IN CAMEROONIAN FAMILIES USING OTOSCOPE AND RELATED GENE-SPECIFIC VARIANT FREQUENCY IN EXOME DATA 105 CAMEROONIAN CONTROL, ALL AFRICAN, EUROPEAN, AND EAST ASIAN FROM 1000 GENOME PROJECT PHASE 3

| Gene    | 95% CI frequency<br>Cameroonian | 95% CI frequency in<br>African from 1000G | 95% CI frequency in<br>European from 1000G | 95% CI frequency in<br>East Asian from 1000G | Gene name                                               | Location  | Inheritance |
|---------|---------------------------------|-------------------------------------------|--------------------------------------------|----------------------------------------------|---------------------------------------------------------|-----------|-------------|
| MYO3A   | 0.21 (0.004-0.46)               | 0.12 (0.0008-0.71)                        | 0.19 (0.001-0.72)                          | 0.14 (0.001-0.63)                            | Myosin IIIA DFNB30                                      | 10p11.1   | Recessive   |
| COL11A2 | 0.14 (0.004-0.48)               | 0.18 (0.0008-0.91)                        | 0.18 (0.001-0.72)                          | 0.22 (0.001-0.97)                            | “collagen type XI alpha 2”<br>DFNB53/DFNA13             | 6p21.3    | Both        |
| MYO1A   | 0.06 (0.002-0.36)               | 0.052 (0.0008-0.15)                       | 0.06 (0.001-0.15)                          | 0.11 (0.001-0.28)                            | Myosin IA DFNA48                                        | 12q13-q15 | Dominant    |
| LOXHD1  | 0.18 (0.004-0.47)               | 0.095 (0.0008-0.64)                       | 0.18 (0.001-0.86)                          | 0.20 (0.001-0.88)                            | Lipoxygenase homology<br>domains 1 DFNB77               | 18q21.1   | Recessive   |
| ADGRV1  | 0.19 (0.0-0.47)                 | 0.126 (0.0008-0.86)                       | 0.14 (0.001-0.76)                          | 0.25 (0.001-0.90)                            | G protein-coupled<br>receptor v1 USH2C                  | 5q14.3    | Recessive   |
| GIPC3   | 0.14 (0.004-0.45)               | 0.11 (0.0008-0.64)                        | 0.12 (0.001-0.54)                          | 0.06 (0.001-0.23)                            | GAIIP C-terminus-interacting<br>protein 3 DFNB15/DFNB95 | 19p13.3   | Recessive   |
| OTOF    | 0.16 (0.004-0.47)               | 0.12 (0.0008-0.8)                         | 0.16 (0.001-0.94)                          | 0.24 (0.001-0.99)                            | Otoferlin DFNB6/9                                       | 2p23.1    | Recessive   |
| CLDN14  | 0.23 (0.004-0.49)               | 0.17 (0.0008-0.8)                         | 0.29 (0.001-0.90)                          | 0.28 (0.001-0.68)                            | Claudin 14 DFNB29                                       | 21q22     | Recessive   |
| WFS1    | 0.21 (0.004-0.5)                | 0.17 (0.0008-0.8)                         | 0.25 (0.001-0.83)                          | 0.451 (0.001-0.99)                           | Wolfram syndrome 1<br>(wolframin) DFNA6/DFNA14          | 4p16.3    | Dominant    |

The frequency was obtained by aggregating the frequencies from all SNPs in LD ( $\geq 0.75$ ) within each gene. 95% CI, 95% confidence interval; LD, linkage disequilibrium; SNPs, single nucleotide polymorphisms.
